# Supplementary material for: A six-mRNA signature model for the prognosis of head and neck squamous cell carcinoma
Source: PubMed Central journal article supplement (PMC5706893; doi:10.18632/oncotarget.21786), 2017-10-10
Supplement: oncotarget-08-94528-s001.pdf [file oncotarget-08-94528-s001.pdf]

# A six-mRNA signature model for the prognosis of head and neck squamous cell carcinoma

## SUPPLEMENTARY MATERIALS

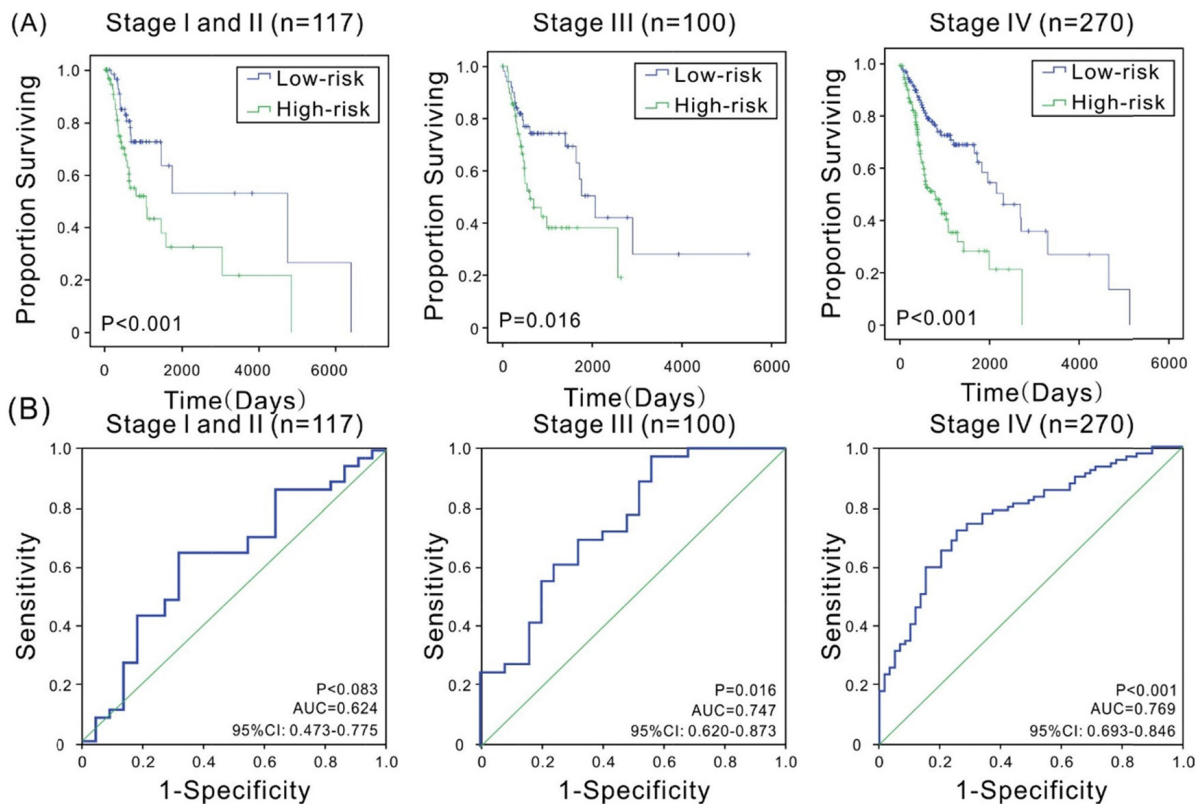

**Supplementary Figure 1: Kaplan-Meier estimates of the overall survival of patients with different clinical stage. (A)** Kaplan-Meier estimates of the overall survival of patients with different stage; **(B)** ROC curves show the sensitivity and specificity of the six-mRNA signature in predicting the patient overall survival.

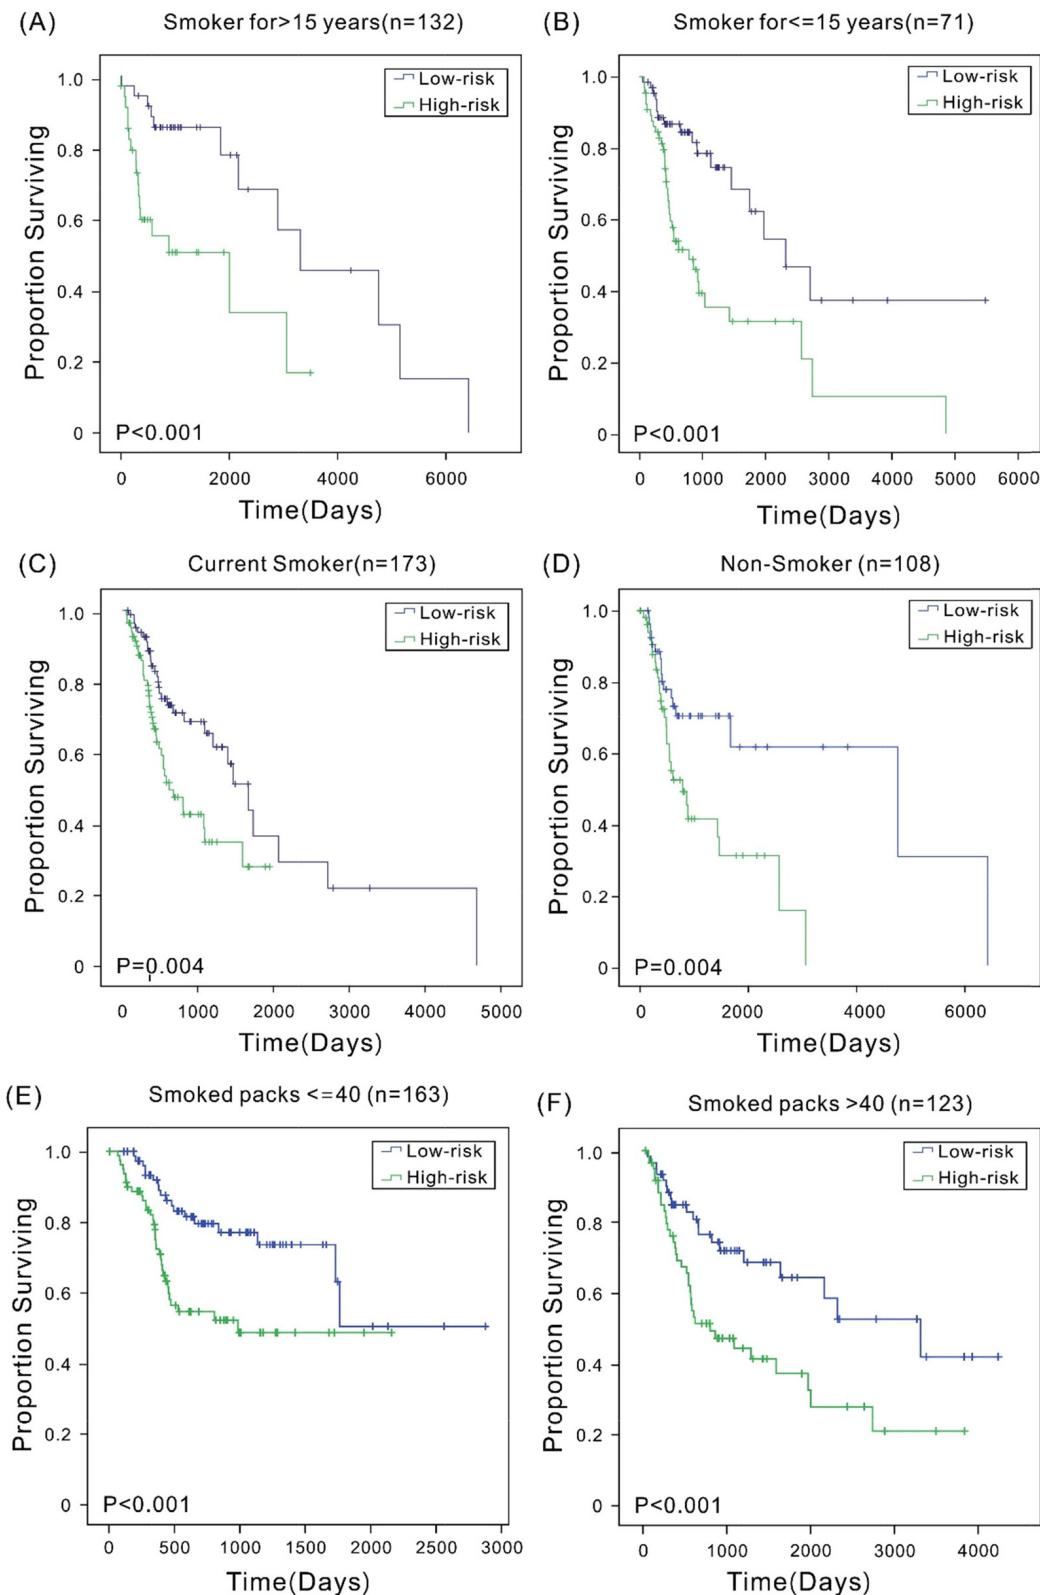

Supplementary Figure 2: Kaplan-Meier estimates of the overall survival of HNSCC patients with different smoking history.

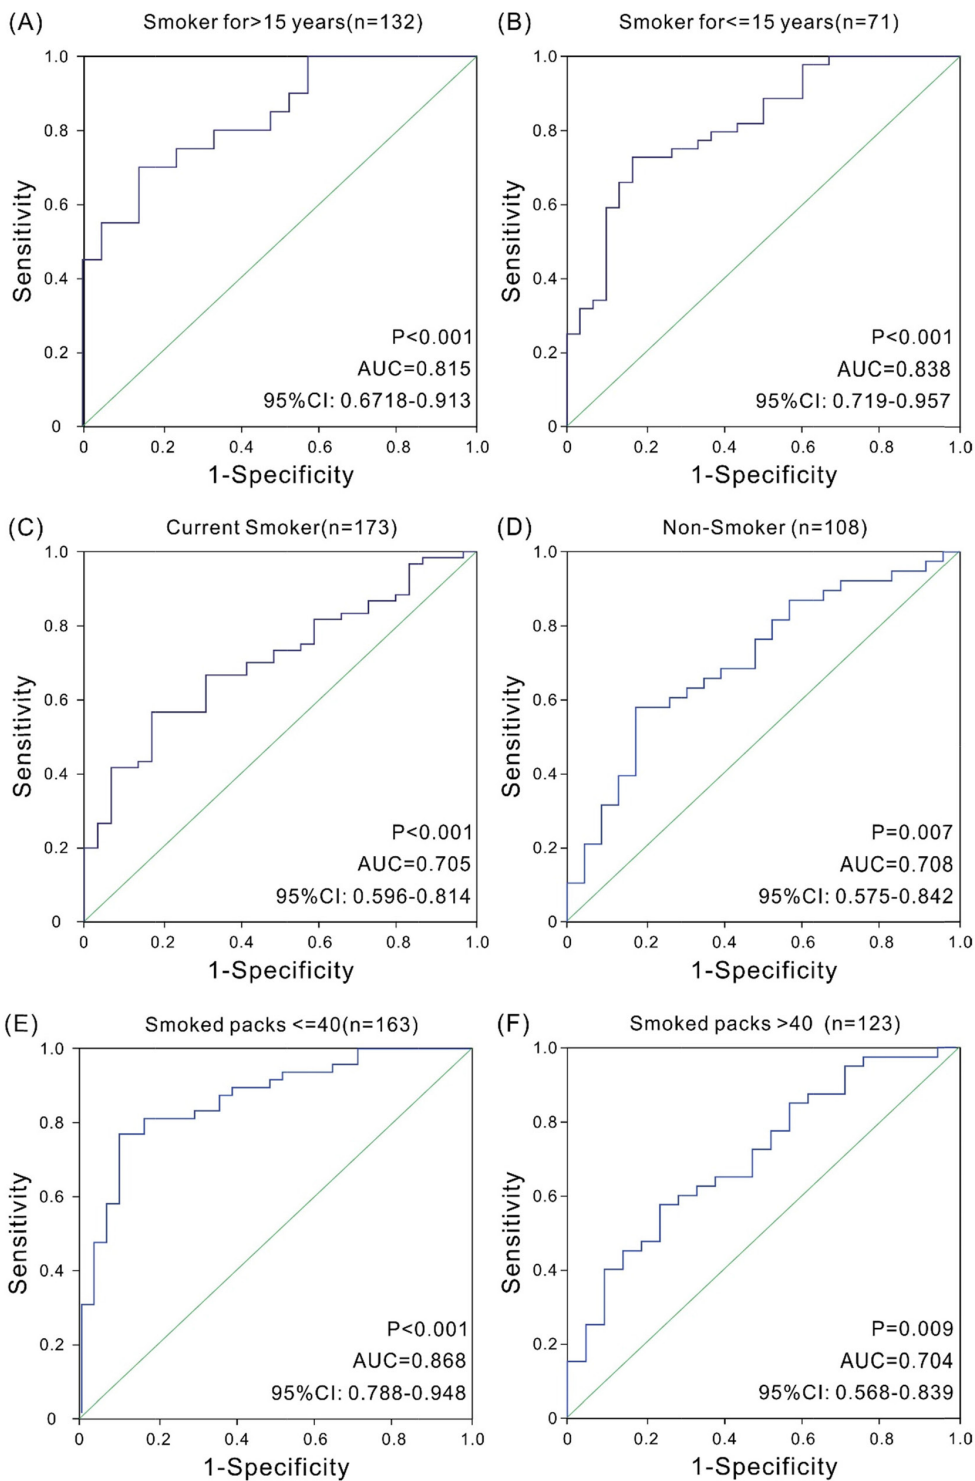

Supplementary Figure 3: ROC analysis of sensitivity and specificity using the six-mRNA signature in predicting the overall survival of HNSCC patients with different smoking history.

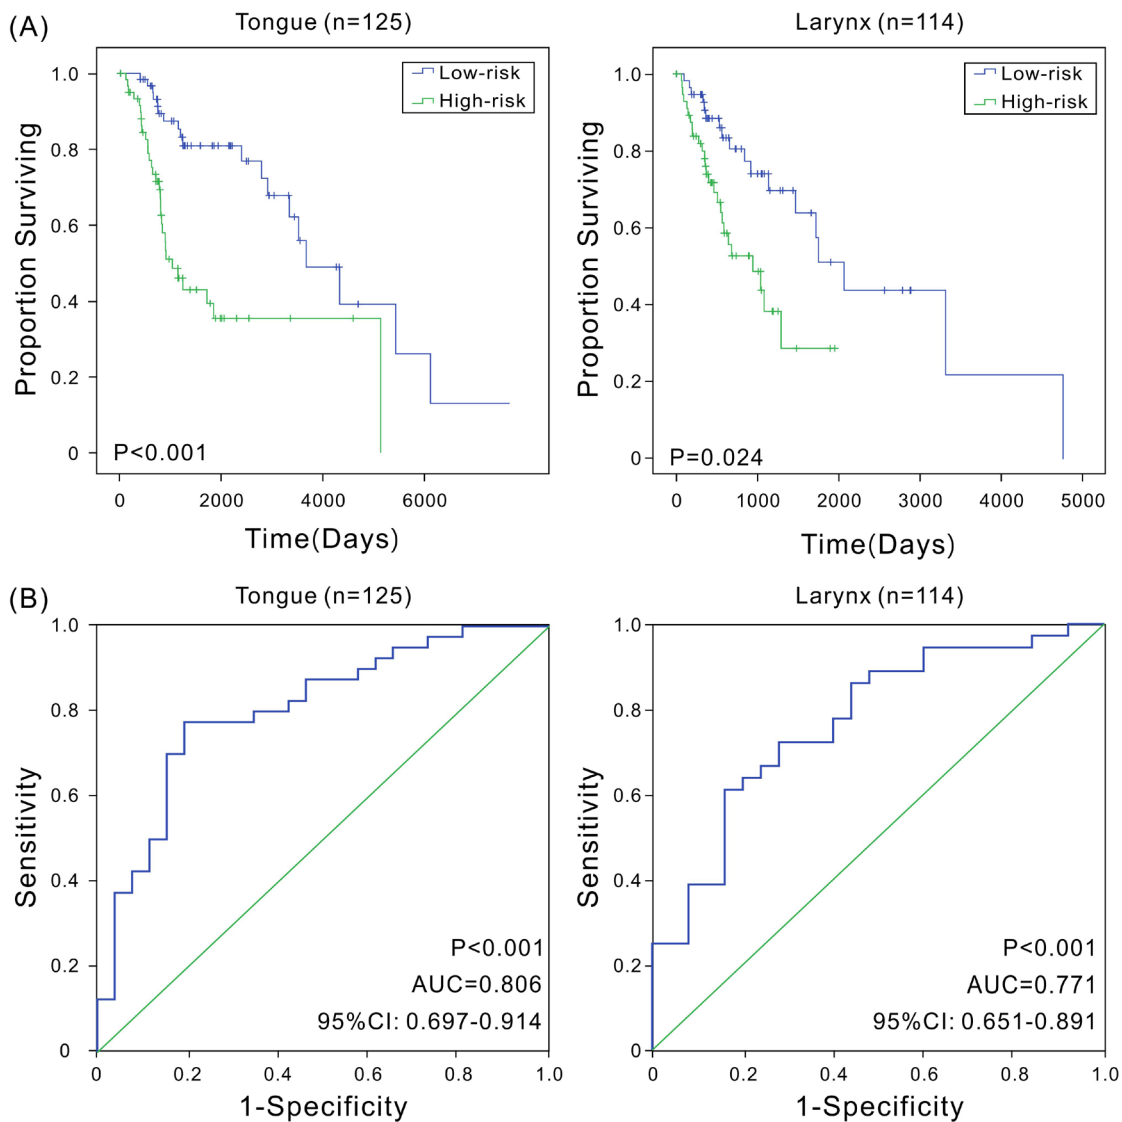

**Supplementary Figure 4: Kaplan-Meier estimates of the overall survival of patients with different tumor tissue site (Tongue and Larynx).** (A) Kaplan-Meier estimates of the overall survival of patients; (B) ROC curves show the sensitivity and specificity of the six-mRNA signature in predicting the patient overall survival.

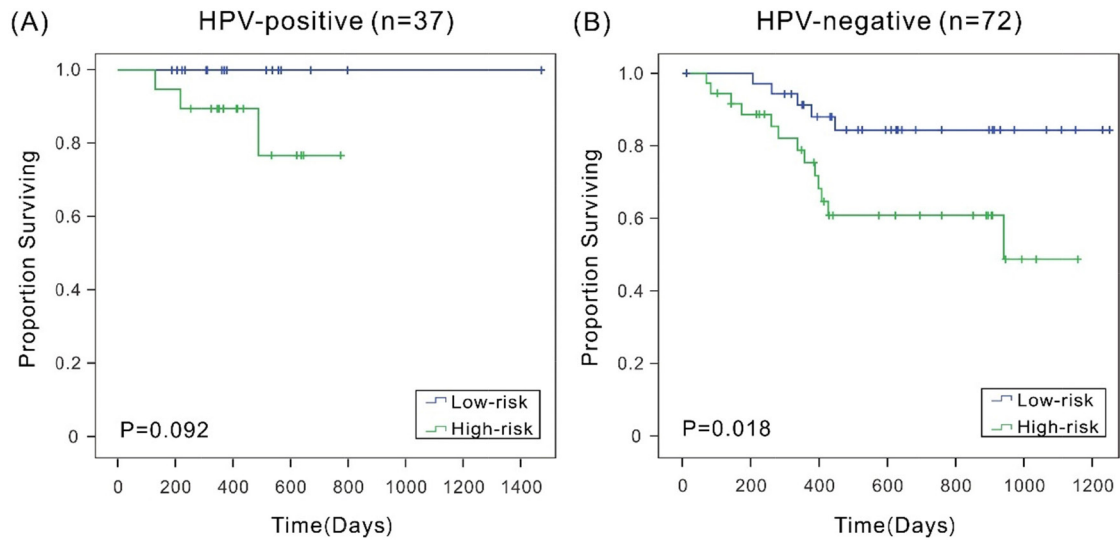

**Supplementary Figure 5:** Kaplan-Meier survival curves show correlation between the six-mRNA signature and overall survival in HPV-positive HNSCC patients (A) and HPV-negative HNSCC patients (B).

**Supplementary Table 1: Sample list and information of HNSCC patients from TCGA database**

See Supplementary File 1

**Supplementary Table 2: Univariate Cox regression analysis with a significance level of 0.001 reveals a significant relation between mRNA expression and survival time, and the t test with differential expression between patients with longer OS and those with shorter OS time**

See Supplementary File 1

Supplementary Table 3: Kaplan-Meier and ROC analyses of the three-lncRNA signature and 10 known biomarkers

| <b>Biomarker</b>   | <b>AUC</b> | <b>P-value</b> | <b>95% CI of AUC</b> | <b>P-value<sup>a</sup></b> |
|--------------------|------------|----------------|----------------------|----------------------------|
| Six-mRNA signature | 0.745      | <0.001         | 0.65-0.84            | <0.001                     |
| <i>TP53</i>        | 0.552      | 0.369          | 0.44-0.66            | 0.329                      |
| <i>PTK2</i>        | 0.513      | 0.816          | 0.40-0.62            | 0.251                      |
| <i>SEC62</i>       | 0.596      | 0.096          | 0.49-0.71            | 0.235                      |
| <i>MALAT1</i>      | 0.520      | 0.730          | 0.41-0.63            | 0.245                      |
| <i>HOTAIR</i>      | 0.568      | 0.240          | 0.46-0.68            | 0.71                       |
| <i>LCE5A</i>       | 0.541      | 0.481          | 0.43-0.65            | 0.011                      |
| <i>EIF4E</i>       | 0.557      | 0.321          | 0.44-0.67            | 0.241                      |
| <i>SOX4</i>        | 0.550      | 0.386          | 0.44-0.66            | 0.164                      |
| <i>MDM2</i>        | 0.538      | 0.905          | 0.40-0.62            | 0.164                      |
| <i>ANO1</i>        | 0.538      | 0.513          | 0.43-0.65            | 0.205                      |

a. log-rank test.
